# Supplementary material for: Evidence of impaired macroautophagy in human degenerative cervical myelopathy
Source: PubMed Central journal article supplement (PMC9279443; doi:10.1038/s41598-022-15158-x), 2022-07-13
Supplement: 41598_2022_15158_MOESM1_ESM.pdf [file 41598_2022_15158_MOESM1_ESM.pdf]

**Title: Evidence of impaired macroautophagy in human degenerative cervical myelopathy**

**Running title: Autophagy in Degenerative Cervical Myelopathy**

Sam S. Smith<sup>3</sup>, Adam M.H. Young<sup>4</sup>, Benjamin M. Davies<sup>1</sup>, Hitoshi Takahashi<sup>4</sup>, Kieren S.J. Allinson<sup>5</sup>, Mark R.N. Kotter. <sup>1-2</sup>

- 1) Academic Neurosurgery Unit, Department of Clinical Neurosurgery, University of Cambridge, Cambridge, UK
- 2) WT MRC Cambridge Stem Cell Institute, Anne McLaren Laboratory, University of Cambridge, UK
- 3) School of Clinical Medicine, University of Cambridge, Cambridge, UK
- 4) Department of Pathology, Brain Research Institute, Niigata University, Niigata, Japan
- 5) Cambridge University Hospitals NHS Foundation Trust and the Cambridge Brain Bank, Cambridge, UK

## Supplementary Figures

| Case | Sex | Age | Cause of death                             |
|------|-----|-----|--------------------------------------------|
| 1    | M   | 80  | Extensive cerebral infarction              |
| 2    | M   | 70  | Disseminated visceral giant cell arteritis |
| 3    | M   | 63  | Colon cancer                               |
| 4    | M   | 59  | Sudden unexpected death                    |
| 5    | M   | 72  | Chronic renal failure                      |
| 6    | F   | 72  | Peritonitis                                |
| 7    | M   | 61  | Pneumonia                                  |

**Supplementary Table 1.** Causes of death for the 7 cases of DCM.

| Control | Sex | Age | Cause of death                                                |
|---------|-----|-----|---------------------------------------------------------------|
| 1       | F   | 73  | Thrombotic Thrombocytopenic purpura                           |
| 2       | F   | 83  | Myasthenia Gravis                                             |
| 3       | F   | 68  | Facioscapulohumeral Muscular Atrophy, Aspiration<br>Pneumonia |
| 4       | M   | 65  | Malignant Lymphoma, Pneumonia                                 |
| 5       | M   | 51  | Acute abdomen                                                 |

**Supplementary Table 2.** Causes of death for the 5 controls.

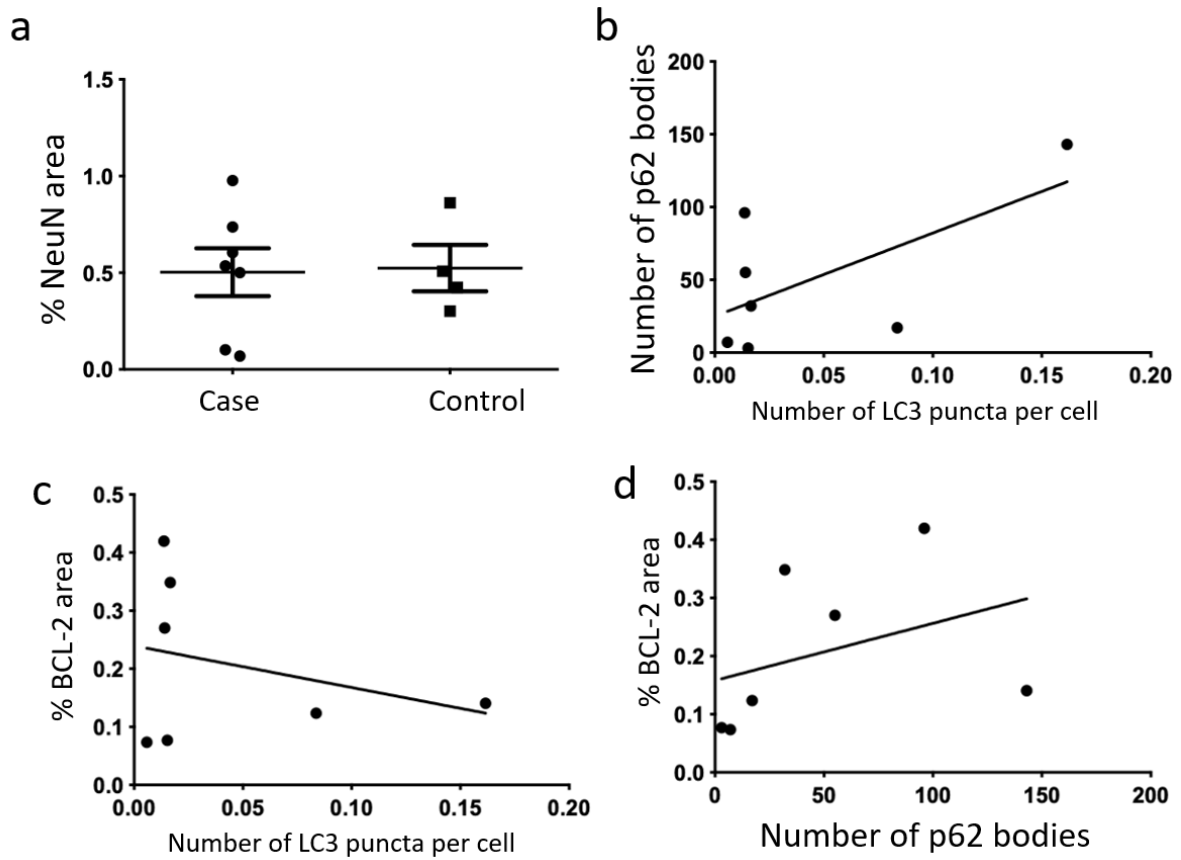

**Supplementary Figure 1.** A) % NeuN area of staining in cases compared to controls. b-d) XY Graphs comparing the relationship between different stains in cases. Correlation was assessed using non-linear regression and statistical significance determined using Pearson correlation. No correlations reached statistical significance.

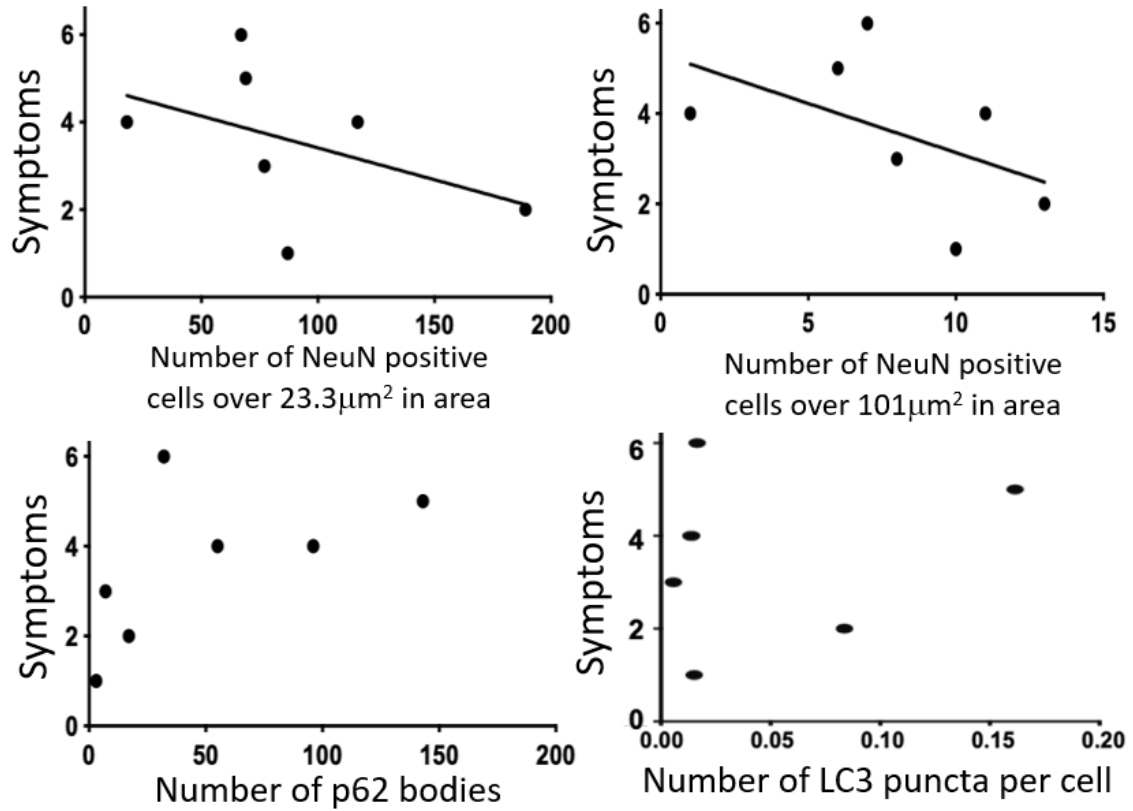

**Supplementary Figure 2.** A-d) XY graphs of cases (n=7) comparing the number of symptom groups against the results of analyses of staining for NeuN, p62 and LC3 earlier in this study. Correlation was assessed using non-linear regression and statistical significance determined using Pearson correlation. No correlations reached statistical significance.
